# Supplementary material for: Superabsorbent Polymer Network Degradable by a Human Urinary Enzyme
Source: MDPI journal article supplement (doi:10.3390/polym13060929), 2021-03-17
Supplement: s1 [file s1]

Supplementary information for

## **Superabsorbent polymer network degradable by a human urinary enzyme**

Minji Whang <sup>1</sup>, Hyeonji Yu <sup>1</sup> and Jungwook Kim \*

<sup>1</sup>Department of Chemical and Biomolecular Engineering, Sogang University, 35, Baekbeom-ro, Mapo-gu, Seoul, Republic of Korea 04107; mjwhang@sogang.ac.kr (M.W.); lkjh6309@sogang.ac.kr (H.Y.)

\*Correspondence: jungwkim@sogang.ac.kr; Tel.: +82-2-704-8793

### **Contents**

Supplementary Figure 1 to 4

Supplementary Table 1 to 2

References

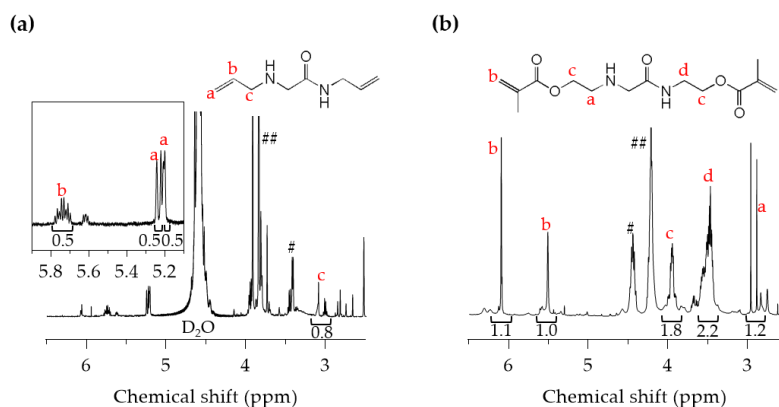

**Figure S1.**  $^1\text{H}$ -NMR spectrum of NCA polymerization initiated by primary amine. (a) Resulting from the reaction of allyl amine. *a*, *b* indicates  $\text{CH}(m)$ ,  $\text{CH}_2(m)$  of vinyl group at 5.2~5.3, 5.6~5.8 ppm and *c* indicates  $\text{CH}_2(t)$  at 2.9~3.1 ppm. #, ## indicates residual allylamine, 2,5-oxazolidinedione at 3.4, 3.8 ppm. The residual  $\text{D}_2\text{O}$  peak appears at 4.8 ppm. (b) Resulting from the reaction of 2-aminoethyl methacrylate. *a*, *b*, *c* indicates  $\text{CH}_2(q)$ ,  $\text{CH}(m)$ ,  $\text{CH}_2(t)$  at 2.8~3.0, 5.5~6.1 of methacrylate group, 3.9 ppm and *d* indicates  $\text{CH}_2(q)$  at 3.5 ppm. #, ## indicates residual 2-AMEA at 4.2, 4.5 ppm.

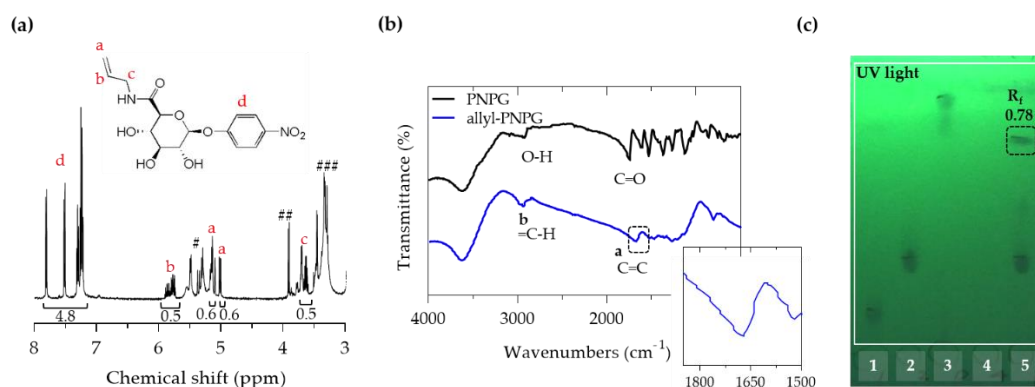

**Figure S2.** Synthesis of PNPG compound. (a)  $^1\text{H}$ -NMR spectrum of allyl-PNPG. *a*, *b* indicates  $\text{CH}(t)$ ,  $\text{CH}(m)$  of vinyl group at 5.0~5.1, 5.6~5.9 ppm. *c*, *d* indicates  $\text{CH}_2(t)$ ,  $\text{CH}(m)$  at 3.5~3.7, .2~7.8 ppm. # indicates residual allylamine at 5.5 ppm. ##, ### indicates residual PNPG at 3.5, 3.9 ppm. (b) FT-IR spectrum of PNPG and allyl-PNPG. *a* indicates  $\text{C}=\text{C}$  bond at 1640~1680 $\text{cm}^{-1}$  (inset), *b* indicates  $=\text{C}-\text{H}$  bond at 3000~3100  $\text{cm}^{-1}$ . (c) TLC of allyl-PNPG. (Marked: (1) PNPG, (2) HOBt, (3) DIC, (4) allylamine, (5) allyl-PNPG ( $R_f$ : 0.78))

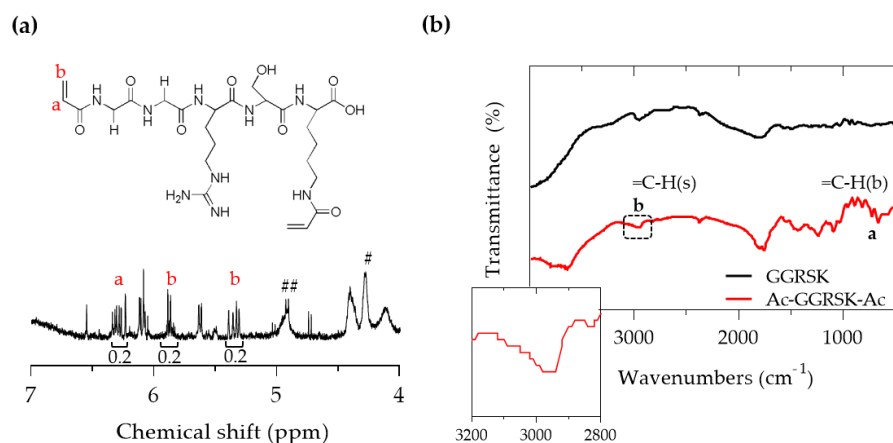

**Figure S3.** Synthesis of peptide crosslinker. (a)  $^1\text{H}$ -NMR spectrum of Ac-GGRSK-Ac. *a*, *b* indicates  $\text{CH}(m)$ ,  $\text{CH}(t)$  of acrylamide at 6.2~6.5, 5.8~5.9 ppm. #, # indicates residual GGRSK at 4.0~4.5, 4.8 ppm. (b) FT-IR spectrum of GGRSK and Ac-GGRSK-Ac. *a* indicates  $=\text{C-H}(b)$  group at 650~1000  $\text{cm}^{-1}$  and *b* indicates  $=\text{C-H}(s)$  group at 3000~3100  $\text{cm}^{-1}$  (inset).

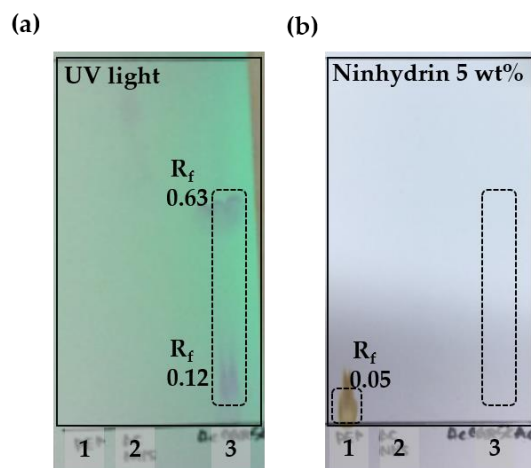

**Figure S4.** TLC of Ac-GGRSK-Ac. (a) UV light. (b) 5 wt% Ninhydrin. (Marked: (1) GGRSK, (2) Ac-NHS ester, (3) Ac-GGRSK-Ac ( $R_f$ : 0.63))

**Table S1.** Detailed information on enzymes used in the study.

|            | Full name                                   | EC #      | Molecular weight (kDa) | Optimal pH | Isoelec. point | Specificity                                                                          | Unit (U) /urine (mL)       |
|------------|---------------------------------------------|-----------|------------------------|------------|----------------|--------------------------------------------------------------------------------------|----------------------------|
| <b>LAP</b> | <i>Leucine aminopeptidase</i>               | 3.4.11.1  | ~ 326                  | 9.0 - 9.5  | 6.07           | Release amino acids from the N-terminus of proteins. React efficiently with leucine. | Male: 82<br>Female: 43 [1] |
| <b>GLU</b> | <i><math>\beta</math>-D-glucuronidase</i>   | 3.2.1.31  | ~ 290                  | 4.5 - 5.0  | 4.8            | Catalyze the conversion of $\beta$ -D-glucuronoside to D-glucuronate                 | 8.8 - 28.4 [2]             |
| <b>uPA</b> | <i>Urokinase-type plasminogen activator</i> | 3.4.21.73 | 33 ~ 54                | 8.5        | 8.78           | A serine protease that cleaves plasminogen to create plasmin.                        | 4.1 [3]                    |

**Table S2.** The pregel composition used to create SAP.

|                  | Chemicals    | Molar ratio (mol %) |
|------------------|--------------|---------------------|
| Monomer          | Acrylic acid | 100                 |
| Crosslinker (1X) | Ac-GGRSK-Ac  | 0.041               |
| Photo initiator  | Darocur 1173 | 0.065               |
| Solvent          | NaOH         | 70                  |
|                  | Water        | 523                 |

## References

1. Goldbarg, J. A.; Rutenburg, A. M., The colorimetric determination of leucine aminopeptidase in urine and serum of normal subjects and patients with cancer and other diseases. *Cancer* **1958**, *11* (2), 283-91.
2. Wu, X.; Loganathan, D.; Linhardt, R. J., Sensitive method for the quantification of beta-glucuronidase activity in human urine using capillary electrophoresis with fluorescence detection. *J Chromatogr B Biomed Sci Appl* **1998**, *708* (1-2), 61-6.
3. Hong, S. Y.; Yang, D. H.; Lee, B. H.; Ki, E. K.; Chung, K. H., The urine urokinase concentration in end stage renal disease with acquired renal cyst. *Korean J Intern Med* **1991**, *6* (2), 64-8.
